# Supplementary material for: The completed genome sequence of the pathogenic ascomycete fungus Fusarium graminearum
Source: PubMed Central journal article supplement (PMC4511438; doi:10.1186/s12864-015-1756-1), 2015-07-22
Supplement: 12864_2015_1756_MOESM2_ESM.pdf [file 12864_2015_1756_MOESM2_ESM.pdf]

**Additional file 2.** Deleted gene models (bp length in brackets, \*isoform).

| Chr 1              | Chr 2            | Chr 3            | Chr 4           |
|--------------------|------------------|------------------|-----------------|
| FGSG_11749 (32)    | FGSG_15223 (58)  | FGSG_12844 (113) | FGSG_15195 (57) |
| FGSG_15045 (66)    | FGSG_15495 (78)  |                  | FGSG_16834 (21) |
| FGSG_15100 (55)    | FGSG_13453 (151) |                  | FGSG_15417 (62) |
| FGSG_15125 (59)    | FGSG_13448 (133) |                  |                 |
| FGSG_16203 (79)    | FGSG_15191 (51)  |                  |                 |
| FGSG_01500 (105)   |                  |                  |                 |
| FGSG_17612 (1039)* |                  |                  |                 |
| FGSG_00674 (167)*  |                  |                  |                 |
| FGSG_15616 (86)    |                  |                  |                 |
