# Supplementary material for: The completed genome sequence of the pathogenic ascomycete fungus Fusarium graminearum
Source: PubMed Central journal article supplement (PMC4511438; doi:10.1186/s12864-015-1756-1), 2015-07-22
Supplement: 12864_2015_1756_MOESM3_ESM.pdf [file 12864_2015_1756_MOESM3_ESM.pdf]

**Additional file 3.** Length of proteins of RRes and MIPS v3.2 sets

| Length                | MIPS            |            | RRes            |            |
|-----------------------|-----------------|------------|-----------------|------------|
|                       | No. of Proteins | % Proteins | No. of Proteins | % Proteins |
| Proteins < 50 aa      | 35              | 0.30%      | 68              | 0.48%      |
| Proteins 50-149 aa    | 2143            | 15.50%     | 2353            | 16.61%     |
| Proteins 150-299 aa   | 2980            | 21.60%     | 2920            | 20.62%     |
| Proteins 300-999 aa   | 7783            | 56.30%     | 7899            | 55.77%     |
| Proteins 1000-3000 aa | 861             | 6.20%      | 899             | 6.35%      |
| Proteins > 3000 aa    | 24              | 0.20%      | 25              | 0.18%      |
