# Supplementary material for: The completed genome sequence of the pathogenic ascomycete fungus Fusarium graminearum
Source: PubMed Central journal article supplement (PMC4511438; doi:10.1186/s12864-015-1756-1), 2015-07-22
Supplement: 12864_2015_1756_MOESM4_ESM.pdf [file 12864_2015_1756_MOESM4_ESM.pdf]

**Additional file 4.** Exons per transcript distribution using Eval.

| Total number of exons /gene model | RRes | MIPS v3.2 | RRes diff | RRes % of total gene models | MIPS % of total gene models |
|-----------------------------------|------|-----------|-----------|-----------------------------|-----------------------------|
| 1                                 | 3536 | 3250      | +286      | 24.96                       | 23.51                       |
| 2                                 | 4206 | 4130      | +76       | 29.70                       | 29.87                       |
| 3                                 | 2961 | 2957      | +4        | 20.91                       | 21.39                       |
| 4                                 | 1616 | 1646      | -30       | 11.41                       | 11.91                       |
| 5                                 | 857  | 866       | -9        | 6.05                        | 6.26                        |
| 6                                 | 440  | 448       | -8        | 3.11                        | 3.24                        |
| 7                                 | 203  | 210       | -7        | 1.43                        | 1.52                        |
| 8                                 | 144  | 127       | +17       | 1.02                        | 0.92                        |
| 9                                 | 90   | 85        | +5        | 0.64                        | 0.61                        |
| 10                                | 44   | 46        | -2        | 0.31                        | 0.33                        |
| 11                                | 30   | 27        | +3        | 0.21                        | 0.20                        |
| 12                                | 17   | 15        | +2        | 0.12                        | 0.11                        |
| 13                                | 6    | 3         | +3        | 0.04                        | 0.02                        |
| 14                                | 5    | 10        | -5        | 0.04                        | 0.07                        |
| 15                                | 4    | 3         | +1        | 0.03                        | 0.02                        |
| 16                                | 1    | 1         | 0         | 0.01                        | 0.01                        |
| 17                                | 2    | 0         | +2        | 0.01                        | 0.00                        |
| 18                                | 0    | 0         | 0         | 0.00                        | 0.00                        |
| 19                                | 1    | 1         | 0         | 0.01                        | 0.01                        |
| 20                                | 0    | 0         | 0         | 0.00                        | 0.00                        |
| 21                                | 1    | 1         | 0         | 0.01                        | 0.01                        |
