# Supplementary material for: The completed genome sequence of the pathogenic ascomycete fungus Fusarium graminearum
Source: PubMed Central journal article supplement (PMC4511438; doi:10.1186/s12864-015-1756-1), 2015-07-22
Supplement: 12864_2015_1756_MOESM5_ESM.pdf [file 12864_2015_1756_MOESM5_ESM.pdf]

**Additional file 5.** New gene predictions blast and GO ID's annotations using Blast2Go. DOCX format.

| SeqName<br>FGRRES_ | Hit-Description                                                     | GO-<br>Group | GO-ID      | Term                                                                                                                                                                                                              |
|--------------------|---------------------------------------------------------------------|--------------|------------|-------------------------------------------------------------------------------------------------------------------------------------------------------------------------------------------------------------------|
| 20004              | hypothetical protein<br>FG00057.1                                   | F            | GO:0016491 | oxidoreductase activity                                                                                                                                                                                           |
| 20006              | related to<br>micromolar calcium<br>activated neutral<br>protease 1 | C            | GO:0005622 | intracellular                                                                                                                                                                                                     |
| 20006              | related to<br>micromolar calcium<br>activated neutral<br>protease 1 | P            | GO:0006508 | proteolysis                                                                                                                                                                                                       |
| 20006              | related to<br>micromolar calcium<br>activated neutral<br>protease 1 | F            | GO:0004198 | calcium-dependent cysteine-type<br>endopeptidase activity                                                                                                                                                         |
| 20036              | hypothetical protein<br>FOVG_01478                                  | F            | GO:0004872 | receptor activity                                                                                                                                                                                                 |
| 20036              | hypothetical protein<br>FOVG_01478                                  | P            | GO:0007275 | multicellular organismal<br>development                                                                                                                                                                           |
| 20036              | hypothetical protein<br>FOVG_01478                                  | C            | GO:0016020 | membrane                                                                                                                                                                                                          |
| 20048              | hypothetical protein<br>FG05_30608                                  | F            | GO:0000981 | sequence-specific DNA binding RNA<br>polymerase II transcription factor<br>activity                                                                                                                               |
| 20048              | hypothetical protein<br>FG05_30608                                  | P            | GO:0006357 | regulation of transcription from RNA<br>polymerase II promoter                                                                                                                                                    |
| 20048              | hypothetical protein<br>FG05_30608                                  | C            | GO:0005634 | nucleus                                                                                                                                                                                                           |
| 20048              | hypothetical protein<br>FG05_30608                                  | F            | GO:0008270 | zinc ion binding                                                                                                                                                                                                  |
| 20056              | epoxide hydrolase                                                   | F            | GO:0016787 | hydrolase activity                                                                                                                                                                                                |
| 20056              | epoxide hydrolase                                                   | P            | GO:0055114 | oxidation-reduction process                                                                                                                                                                                       |
| 20056              | epoxide hydrolase                                                   | F            | GO:0016706 | oxidoreductase activity, acting on<br>paired donors, with incorporation or<br>reduction of molecular oxygen, 2-<br>oxoglutarate as one donor, and<br>incorporation of one atom each of<br>oxygen into both donors |
| 20063              | v-type h+-<br>transporting atpase<br>subunit h                      | F            | GO:0015078 | hydrogen ion transmembrane<br>transporter activity                                                                                                                                                                |
| 20063              | v-type h+-<br>transporting atpase<br>subunit h                      | F            | GO:0042625 | ATPase activity, coupled to<br>transmembrane movement of ions                                                                                                                                                     |
| 20063              | v-type h+-<br>transporting atpase<br>subunit h                      | C            | GO:0000329 | fungus-type vacuole membrane                                                                                                                                                                                      |

|       |                                                          |   |            |                                                       |
|-------|----------------------------------------------------------|---|------------|-------------------------------------------------------|
| 20063 | v-type h <sup>+</sup> -transporting atpase subunit h     | P | GO:0000032 | cell wall mannoprotein biosynthetic process           |
| 20063 | v-type h <sup>+</sup> -transporting atpase subunit h     | P | GO:0006461 | protein complex assembly                              |
| 20063 | v-type h <sup>+</sup> -transporting atpase subunit h     | P | GO:0007035 | vacuolar acidification                                |
| 20063 | v-type h <sup>+</sup> -transporting atpase subunit h     | C | GO:0000220 | vacuolar proton-transporting V-type ATPase, VO domain |
| 20063 | v-type h <sup>+</sup> -transporting atpase subunit h     | P | GO:0015991 | ATP hydrolysis coupled proton transport               |
| 20064 | hypothetical protein FG01998.1                           | F | GO:0008270 | zinc ion binding                                      |
| 20064 | hypothetical protein FG01998.1                           | F | GO:0016832 | aldehyde-lyase activity                               |
| 20064 | hypothetical protein FG01998.1                           | P | GO:0005975 | carbohydrate metabolic process                        |
| 20067 | related to permease of the major facilitator superfamily | C | GO:0016021 | integral component of membrane                        |
| 20067 | related to permease of the major facilitator superfamily | F | GO:0003723 | RNA binding                                           |
| 20067 | related to permease of the major facilitator superfamily | F | GO:0008270 | zinc ion binding                                      |
| 20067 | related to permease of the major facilitator superfamily | P | GO:0055085 | transmembrane transport                               |
| 20078 | hypothetical protein FG05_30155                          | C | GO:0016021 | integral component of membrane                        |
| 20101 | hypothetical protein FG10427.1                           | F | GO:0050660 | 2ydrol adenine dinucleotide binding                   |
| 20101 | hypothetical protein FG10427.1                           | F | GO:0008762 | UDP-N-acetylmuramate dehydrogenase activity           |
| 20101 | hypothetical protein FG10427.1                           | P | GO:0055114 | oxidation-reduction process                           |
| 20105 | arylsulfatase precursor                                  | F | GO:0016787 | hydrolase activity                                    |
| 20105 | arylsulfatase precursor                                  | P | GO:0008152 | metabolic process                                     |
| 20107 | hypothetical protein FOTG_17375                          | F | GO:0003824 | catalytic activity                                    |

|       |                                    |   |            |                                                                                                              |
|-------|------------------------------------|---|------------|--------------------------------------------------------------------------------------------------------------|
| 20107 | hypothetical protein<br>FOTG_17375 | P | GO:0009116 | nucleoside metabolic process                                                                                 |
| 20116 | glucose transporter<br>rco-3       | C | GO:0016021 | integral component of membrane                                                                               |
| 20116 | glucose transporter<br>rco-3       | F | GO:0022891 | substrate-specific transmembrane<br>transporter activity                                                     |
| 20116 | glucose transporter<br>rco-3       | P | GO:0055085 | transmembrane transport                                                                                      |
| 20116 | glucose transporter<br>rco-3       | P | GO:0008643 | carbohydrate transport                                                                                       |
| 20126 | hypothetical protein<br>FG05_30313 | C | GO:0005956 | protein kinase CK2 complex                                                                                   |
| 20126 | hypothetical protein<br>FG05_30313 | P | GO:0045859 | regulation of protein kinase activity                                                                        |
| 20126 | hypothetical protein<br>FG05_30313 | P | GO:0006357 | regulation of transcription from RNA<br>polymerase II promoter                                               |
| 20126 | hypothetical protein<br>FG05_30313 | F | GO:0008270 | zinc ion binding                                                                                             |
| 20126 | hypothetical protein<br>FG05_30313 | F | GO:0000981 | sequence-specific DNA binding RNA<br>polymerase II transcription factor<br>activity                          |
| 20126 | hypothetical protein<br>FG05_30313 | F | GO:0003677 | DNA binding                                                                                                  |
| 20126 | hypothetical protein<br>FG05_30313 | C | GO:0005634 | nucleus                                                                                                      |
| 20126 | hypothetical protein<br>FG05_30313 | F | GO:0019887 | protein kinase regulator activity                                                                            |
| 20151 | hypothetical protein<br>FG08862.1  | F | GO:0008270 | zinc ion binding                                                                                             |
| 20151 | hypothetical protein<br>FG08862.1  | F | GO:0003676 | nucleic acid binding                                                                                         |
| 20168 | hypothetical protein<br>FG05_03154 | P | GO:0055114 | oxidation-reduction process                                                                                  |
| 20168 | hypothetical protein<br>FG05_03154 | P | GO:0006357 | regulation of transcription from RNA<br>polymerase II promoter                                               |
| 20168 | hypothetical protein<br>FG05_03154 | F | GO:0008270 | zinc ion binding                                                                                             |
| 20168 | hypothetical protein<br>FG05_03154 | F | GO:0000981 | sequence-specific DNA binding RNA<br>polymerase II transcription factor<br>activity                          |
| 20168 | hypothetical protein<br>FG05_03154 | F | GO:0016491 | oxidoreductase activity                                                                                      |
| 20168 | hypothetical protein<br>FG05_03154 | C | GO:0005634 | nucleus                                                                                                      |
| 20171 | aldolase                           | P | GO:0006725 | cellular aromatic compound<br>metabolic process                                                              |
| 20171 | aldolase                           | F | GO:0016830 | carbon-carbon lyase activity                                                                                 |
| 20172 | cytochrome p450<br>oxidoreductase  | F | GO:0016708 | oxidoreductase activity, acting on<br>paired donors, with incorporation or<br>reduction of molecular oxygen, |

|       |                                 |   |            |                                                                               |
|-------|---------------------------------|---|------------|-------------------------------------------------------------------------------|
|       |                                 |   |            | NAD(P)H as one donor, and incorporation of two atoms of oxygen into one donor |
| 20172 | cytochrome p450 oxidoreductase  | P | GO:0019439 | aromatic compound catabolic process                                           |
| 20172 | cytochrome p450 oxidoreductase  | F | GO:0004497 | monooxygenase activity                                                        |
| 20172 | cytochrome p450 oxidoreductase  | F | GO:0005506 | iron ion binding                                                              |
| 20172 | cytochrome p450 oxidoreductase  | F | GO:0051537 | 2 iron, 2 sulfur cluster binding                                              |
| 20172 | cytochrome p450 oxidoreductase  | P | GO:0055114 | oxidation-reduction process                                                   |
| 20176 | pathogenicity protein           | F | GO:0005215 | transporter activity                                                          |
| 20182 | hypothetical protein FG05_35086 | P | GO:0006357 | regulation of transcription from RNA polymerase II promoter                   |
| 20182 | hypothetical protein FG05_35086 | F | GO:0008270 | zinc ion binding                                                              |
| 20182 | hypothetical protein FG05_35086 | F | GO:0000981 | sequence-specific DNA binding RNA polymerase II transcription factor activity |
| 20182 | hypothetical protein FG05_35086 | F | GO:0003677 | DNA binding                                                                   |
| 20182 | hypothetical protein FG05_35086 | C | GO:0005634 | nucleus                                                                       |
| 20189 | homocitrate synthase            | F | GO:0004410 | homocitrate synthase activity                                                 |
| 20189 | homocitrate synthase            | C | GO:0016021 | integral component of membrane                                                |
| 20189 | homocitrate synthase            | C | GO:0005634 | nucleus                                                                       |
| 20189 | homocitrate synthase            | C | GO:0005739 | mitochondrion                                                                 |
| 20189 | homocitrate synthase            | P | GO:0019878 | lysine biosynthetic process via amino adipic acid                             |
| 20236 | cytochrome p450                 | P | GO:0006357 | regulation of transcription from RNA polymerase II promoter                   |
| 20236 | cytochrome p450                 | F | GO:0008270 | zinc ion binding                                                              |
| 20236 | cytochrome p450                 | F | GO:0000981 | sequence-specific DNA binding RNA polymerase II transcription factor activity |
| 20236 | cytochrome p450                 | F | GO:0003677 | DNA binding                                                                   |
| 20236 | cytochrome p450                 | C | GO:0005634 | nucleus                                                                       |
| 20239 | rta1 domain-containing protein  | P | GO:0006357 | regulation of transcription from RNA polymerase II promoter                   |
| 20239 | rta1 domain-containing protein  | F | GO:0008270 | zinc ion binding                                                              |
| 20239 | rta1 domain-containing protein  | F | GO:0004553 | hydrolase activity, 4hydrolysing O-glycosyl compounds                         |

|       |                                           |   |            |                                                                               |
|-------|-------------------------------------------|---|------------|-------------------------------------------------------------------------------|
| 20239 | rta1 domain-containing protein            | F | GO:0000981 | sequence-specific DNA binding RNA polymerase II transcription factor activity |
| 20239 | rta1 domain-containing protein            | F | GO:0016758 | transferase activity, transferring hexosyl groups                             |
| 20239 | rta1 domain-containing protein            | C | GO:0005634 | nucleus                                                                       |
| 20239 | rta1 domain-containing protein            | P | GO:0030259 | lipid glycosylation                                                           |
| 20242 | hypothetical protein FG05_04947           | F | GO:0046872 | metal ion binding                                                             |
| 20242 | hypothetical protein FG05_04947           | F | GO:0004672 | protein kinase activity                                                       |
| 20242 | hypothetical protein FG05_04947           | P | GO:0006468 | protein phosphorylation                                                       |
| 20242 | hypothetical protein FG05_04947           | F | GO:0005524 | ATP binding                                                                   |
| 20245 | hypothetical protein FG05020.1            | F | GO:0008270 | zinc ion binding                                                              |
| 20247 | zinc finger protein ozf-like protein      | F | GO:0046872 | metal ion binding                                                             |
| 20251 | ---NA---                                  | F | GO:0016491 | oxidoreductase activity                                                       |
| 20251 | ---NA---                                  | P | GO:0055114 | oxidation-reduction process                                                   |
| 20255 | rpp14 family                              | F | GO:0004540 | ribonuclease activity                                                         |
| 20255 | rpp14 family                              | P | GO:0090501 | RNA phosphodiester bond hydrolysis                                            |
| 20255 | rpp14 family                              | P | GO:0008033 | tRNA processing                                                               |
| 20264 | phosphatidylinositol 4-kinase             | P | GO:0046854 | phosphatidylinositol phosphorylation                                          |
| 20264 | phosphatidylinositol 4-kinase             | F | GO:0004430 | 1-phosphatidylinositol 4-kinase activity                                      |
| 20264 | phosphatidylinositol 4-kinase             | P | GO:0006661 | phosphatidylinositol biosynthetic process                                     |
| 20264 | phosphatidylinositol 4-kinase             | P | GO:0048015 | phosphatidylinositol-mediated signaling                                       |
| 20264 | phosphatidylinositol 4-kinase             | F | GO:0005488 | binding                                                                       |
| 20283 | hypothetical protein FPSE_02973           | P | GO:0009306 | protein secretion                                                             |
| 20289 | fungal transcriptional regulatory protein | F | GO:0000981 | sequence-specific DNA binding RNA polymerase II transcription factor activity |
| 20289 | fungal transcriptional regulatory protein | P | GO:0006357 | regulation of transcription from RNA polymerase II promoter                   |
| 20289 | fungal transcriptional regulatory protein | C | GO:0005634 | nucleus                                                                       |
| 20289 | fungal transcriptional regulatory protein | F | GO:0008270 | zinc ion binding                                                              |

|       |                                                  |   |            |                                                                                                                                         |
|-------|--------------------------------------------------|---|------------|-----------------------------------------------------------------------------------------------------------------------------------------|
| 20292 | hypothetical protein FG06162.1                   | F | GO:0004190 | aspartic-type endopeptidase activity                                                                                                    |
| 20292 | hypothetical protein FG06162.1                   | P | GO:0006508 | proteolysis                                                                                                                             |
| 20294 | serine threonine protein kinase                  | F | GO:0004672 | protein kinase activity                                                                                                                 |
| 20294 | serine threonine protein kinase                  | P | GO:0006468 | protein phosphorylation                                                                                                                 |
| 20294 | serine threonine protein kinase                  | F | GO:0005524 | ATP binding                                                                                                                             |
| 20304 | meiosis protein mei2                             | F | GO:0003676 | nucleic acid binding                                                                                                                    |
| 20304 | meiosis protein mei2                             | F | GO:0000166 | nucleotide binding                                                                                                                      |
| 20323 | hypothetical protein FG11465.1                   | F | GO:0020037 | heme binding                                                                                                                            |
| 20323 | hypothetical protein FG11465.1                   | F | GO:0016705 | oxidoreductase activity, acting on paired donors, with incorporation or reduction of molecular oxygen                                   |
| 20323 | hypothetical protein FG11465.1                   | F | GO:0004497 | monooxygenase activity                                                                                                                  |
| 20323 | hypothetical protein FG11465.1                   | F | GO:0005506 | iron ion binding                                                                                                                        |
| 20323 | hypothetical protein FG11465.1                   | P | GO:0055114 | oxidation-reduction process                                                                                                             |
| 20326 | hypothetical protein FG05_35376                  | F | GO:0043565 | sequence-specific DNA binding                                                                                                           |
| 20326 | hypothetical protein FG05_35376                  | F | GO:0003700 | sequence-specific DNA binding transcription factor activity                                                                             |
| 20326 | hypothetical protein FG05_35376                  | P | GO:0006355 | regulation of transcription, DNA-templated                                                                                              |
| 20327 | alpha-n-arabinofuranosidase                      | F | GO:0046556 | alpha-L-arabinofuranosidase activity                                                                                                    |
| 20327 | alpha-n-arabinofuranosidase                      | C | GO:0005576 | extracellular region                                                                                                                    |
| 20327 | alpha-n-arabinofuranosidase                      | P | GO:0046373 | L-arabinose metabolic process                                                                                                           |
| 20327 | alpha-n-arabinofuranosidase                      | F | GO:0030248 | cellulose binding                                                                                                                       |
| 20330 | related to galactoside o-acetyltransferase       | F | GO:0016407 | acetyltransferase activity                                                                                                              |
| 20330 | related to galactoside o-acetyltransferase       | P | GO:0008152 | metabolic process                                                                                                                       |
| 20373 | alkylated dna repair protein alkb like protein 8 | P | GO:0055114 | oxidation-reduction process                                                                                                             |
| 20373 | alkylated dna repair protein alkb like protein 8 | F | GO:0016706 | oxidoreductase activity, acting on paired donors, with incorporation or reduction of molecular oxygen, 2-oxoglutarate as one donor, and |

|       |                                    |   |            |                                                           |
|-------|------------------------------------|---|------------|-----------------------------------------------------------|
|       |                                    |   |            | incorporation of one atom each of oxygen into both donors |
| 20377 | cutinase                           | C | GO:0005576 | extracellular region                                      |
| 20377 | cutinase                           | P | GO:0008152 | metabolic process                                         |
| 20377 | cutinase                           | F | GO:0050525 | cutinase activity                                         |
| 20397 | hypothetical protein<br>FPSE_09629 | P | GO:0032259 | methylation                                               |
| 20397 | hypothetical protein<br>FPSE_09629 | F | GO:0008168 | methyltransferase activity                                |
| 20406 | serine threonine<br>protein kinase | P | GO:0006468 | protein phosphorylation                                   |
| 20406 | serine threonine<br>protein kinase | F | GO:0005524 | ATP binding                                               |
| 20406 | serine threonine<br>protein kinase | P | GO:0046677 | response to antibiotic                                    |
| 20406 | serine threonine<br>protein kinase | F | GO:0004674 | protein serine/threonine kinase<br>activity               |
| 20409 | gag protein                        | F | GO:0003676 | nucleic acid binding                                      |
| 20409 | gag protein                        | F | GO:0008270 | zinc ion binding                                          |
| 20411 | histone h4                         | C | GO:0000786 | nucleosome                                                |
| 20411 | histone h4                         | P | GO:0043581 | mycelium development                                      |
| 20411 | histone h4                         | F | GO:0003677 | DNA binding                                               |
| 20411 | histone h4                         | P | GO:0006334 | nucleosome assembly                                       |
| 20411 | histone h4                         | F | GO:0046982 | protein heterodimerization activity                       |
| 20411 | histone h4                         | P | GO:0006352 | DNA-templated transcription,<br>initiation                |
| 20411 | histone h4                         | C | GO:0005634 | nucleus                                                   |
