# Supplementary material for: The completed genome sequence of the pathogenic ascomycete fungus Fusarium graminearum
Source: PubMed Central journal article supplement (PMC4511438; doi:10.1186/s12864-015-1756-1), 2015-07-22
Supplement: 12864_2015_1756_MOESM6_ESM.pdf [file 12864_2015_1756_MOESM6_ESM.pdf]

**Additional file 6.** Description of secretome methodology.

RRes secretome prediction found signal domain (RRes:2189), removal of sequences with transmembrane domains (RRes:1776) using Interproscan, exclusion of proteins smaller than 20, and the use of ProtComp (Version 9.0) LocDB and PotLocDB to exclude GPI anchored membrane proteins and other non-extracellular loci proteins (RRes:1602), followed by WoLFPSort [28] (extracellular score > 17, WoLFPSort) (RRes:705) ) to identify final destination and big-PI [29] to further remove GPI-anchored proteins (RRes:616).

For the 412 new genes the use of blast NCBI 04/09/14 and Interproscan in blast2go revealed, after the blast2go filtering algorithm, 147 of the new gene protein sequences had blast hits using an e-value of 0.001 before blast2go filtering, and 115 had Interproscan functional annotation. After merging of GO terms from Interproscan, 99 Level 2 biological process and 64 molecular function GO terms were identified, see Table-4. Of the 412, 44 of the new genes have signal domains but 6 have transmembrane of those 38, 12 passed the extracellular filtering using ProtComp (Version 9.0) and WoLFPSort (extracellular score > 17) could be new secretome proteins. The top-hit species blast results are shown in supplementary Table-12 which shows that many of the new genes have similar gene models reported in other genome assemblies/annotations of *F. graminearum* or in lesser cases other fungi.

Complete list of FGRRES\_gene ID's of predicted secretome and those uniquely predicted vs the *Brown et al* secretome set. \*(MIPS V30 ID) gene identified in *Brown et al* secretome which used MIPS V30 gene models, \*\*(RRes ID) gene model from MIPS version V32. 144 of the RRes predictions were confirmed using proteomics from *Yang et al* and *Paper et al*. <sup>£</sup>30 of the 70 proteins identified in the *Yang et al* study from proteins identified in *F. graminearum* culture supernatants after growth in wheat or barley flour-containing medium were confirmed in the in silico predictions. <sup>§</sup>137 of the 286

from the extracellular proteins in vitro and in planta from the pathogenic fungus *F. graminearum* in the *Paper et al* study were confirmed in the in silico predictions.

| RRes (all)<br>(n=616) | Identified in both studies<br>(n= 515) | RRes (unique)<br>(n=101) | Brown <i>et al.</i> ,<br>(2012) (unique)<br>(n=59) |
|-----------------------|----------------------------------------|--------------------------|----------------------------------------------------|
| 00002                 | 00002                                  | 00072                    | 00129                                              |
| 00006                 | 00006                                  | 00571                    | 00742                                              |
| 00009                 | 00009                                  | 01351                    | 00806                                              |
| 00023                 | 00023                                  | 01711                    | 01437                                              |
| 00028 <sup>§</sup>    | 00028                                  | 01846                    | 01588                                              |
| 00029                 | 00029                                  | 01993                    | 02348                                              |
| 00060 <sup>§</sup>    | 00060                                  | 02190                    | 02685                                              |
| 00061                 | 00061                                  | 02204                    | 02976                                              |
| 00062                 | 00062                                  | 02293                    | 03406                                              |
| 00072                 | 00100                                  | 02328                    | 03495                                              |
| 00100 <sup>§</sup>    | 00111                                  | 02351                    | 03574                                              |
| 00111                 | 00112                                  | 02385                    | 03816                                              |
| 00112                 | 00114                                  | 02408                    | 03827                                              |
| 00114 <sup>§</sup>    | 00131                                  | 02721                    | 03842                                              |
| 00131                 | 00184                                  | 03114                    | 03975                                              |
| 00184 <sup>§</sup>    | 00230                                  | 03157                    | 04372                                              |
| 00230                 | 00260                                  | 03662                    | 04397                                              |
| 00260                 | 00294                                  | 03713                    | 04521                                              |
| 00294                 | 00411                                  | 04345                    | 04597                                              |
| 00411                 | 00569                                  | 04758                    | 04699                                              |
| 00569                 | 00642                                  | 04781                    | 04824                                              |
| 00571 <sup>§</sup>    | 00783                                  | 05345                    | 04900                                              |
| 00642                 | 00847                                  | 05628                    | 05757                                              |
| 00783                 | 00987                                  | 05835                    | 06479                                              |
| 00847                 | 00989                                  | 06549                    | 06572                                              |
| 00987                 | 01239                                  | 06888                    | 06605                                              |
| 00989 <sup>§</sup>    | 01240                                  | 07010                    | 06616                                              |
| 01239                 | 01283                                  | 07772                    | 06712                                              |
| 01240                 | 01570                                  | 08003                    | 06741(16708)**                                     |
| 01283                 | 01595                                  | 08493                    | 07556(16845)**                                     |
| 01351                 | 01598                                  | 09522                    | 07678                                              |
| 01570                 | 01603                                  | 10604                    | 07871                                              |
| 01595 <sup>§</sup>    | 01607                                  | 11077                    | 07944                                              |
| 01598                 | 01621                                  | 11231                    | 08136                                              |
| 01603                 | 01636                                  | 11333                    | 08415                                              |
| 01607 <sup>§</sup>    | 01660                                  | 11350                    | 08454(17031)**                                     |

|                    |       |       |                |
|--------------------|-------|-------|----------------|
| 01621 <sup>§</sup> | 01674 | 11361 | 08549          |
| 01636              | 01685 | 12486 | 08583(17009)** |
| 01660              | 01688 | 12652 | 09291          |
| 01674              | 01728 | 13462 | 09307          |
| 01685              | 01748 | 15885 | 09390          |
| 01688              | 01754 | 15937 | 09742          |
| 01711              | 01763 | 15958 | 10525          |
| 01728              | 01776 | 16044 | 10595          |
| 01748 <sup>§</sup> | 01778 | 16066 | 11164          |
| 01754              | 01803 | 16175 | 11236          |
| 01763              | 01815 | 16196 | 11472          |
| 01776              | 01818 | 16234 | 11517(16047)** |
| 01778              | 01829 | 16333 | 11645          |
| 01803              | 01831 | 16334 | 11745(15729)** |
| 01815              | 01872 | 16408 | 12337          |
| 01829 <sup>§</sup> | 01982 | 16459 | 12414(16243)** |
| 01831              | 01988 | 16547 | 12439          |
| 01846              | 02015 | 16584 | 13583(17212)** |
| 01872              | 02059 | 16623 | 13883          |
| 01982              | 02154 | 16668 | 13924(17524)** |
| 01988 <sup>§</sup> | 02202 | 16697 | 13992(17575)** |
| 01993 <sup>§</sup> | 02228 | 16759 | 15260(16423)** |
| 02015              | 02255 | 16883 | 15448          |
| 02059 <sup>§</sup> | 02263 | 16898 |                |
| 02190              | 02269 | 17022 |                |
| 02202              | 02309 | 17115 |                |
| 02204 <sup>§</sup> | 02314 | 17419 |                |
| 02228              | 02330 | 17425 |                |
| 02255 <sup>§</sup> | 02332 | 17434 |                |
| 02263              | 02339 | 17455 |                |
| 02269              | 02354 | 17468 |                |
| 02293              | 02360 | 17469 |                |
| 02309 <sup>§</sup> | 02378 | 17494 |                |
| 02314              | 02422 | 17545 |                |
| 02328              | 02448 | 17566 |                |
| 02330              | 02651 | 20027 |                |
| 02332              | 02658 | 20104 |                |
| 02339 <sup>§</sup> | 02674 | 20176 |                |
| 02351              | 02686 | 20208 |                |
| 02354 <sup>§</sup> | 02841 | 20240 |                |
| 02360 <sup>§</sup> | 02888 | 20306 |                |
| 02378              | 02890 | 20325 |                |

|                     |       |         |  |
|---------------------|-------|---------|--|
| 02385               | 02893 | 20327   |  |
| 02408               | 02899 | 20377   |  |
| 02422               | 02917 | 20390   |  |
| 02448               | 02918 | 20400   |  |
| 02651               | 02933 | 20407   |  |
| 02658 <sup>ES</sup> | 02962 | 02909_M |  |
| 02674               | 02977 | 04165_M |  |
| 02686               | 02987 | 04374_M |  |
| 02721 <sup>S</sup>  | 02999 | 04756_M |  |
| 02841               | 03002 | 07126_M |  |
| 02888               | 03003 | 07686_M |  |
| 02890               | 03034 | 08074_M |  |
| 02893               | 03035 | 09143_M |  |
| 02899               | 03049 | 10563_M |  |
| 02917               | 03050 | 10607_M |  |
| 02918 <sup>S</sup>  | 03052 | 10776_M |  |
| 02933               | 03054 | 11513_M |  |
| 02962               | 03096 | 12405_M |  |
| 02987               | 03109 | 13975_M |  |
| 02999               | 03121 | 13987_M |  |
| 03002 <sup>S</sup>  | 03122 | 15136_M |  |
| 03003 <sup>ES</sup> | 03123 | 15714_M |  |
| 03035 <sup>ES</sup> | 03130 | 17388_M |  |
| 03049 <sup>S</sup>  | 03131 |         |  |
| 03050               | 03143 |         |  |
| 03052 <sup>S</sup>  | 03156 |         |  |
| 03054 <sup>S</sup>  | 03194 |         |  |
| 03096               | 03209 |         |  |
| 03109               | 03212 |         |  |
| 03114 <sup>S</sup>  | 03217 |         |  |
| 03121               | 03243 |         |  |
| 03122               | 03274 |         |  |
| 03123 <sup>S</sup>  | 03275 |         |  |
| 03130               | 03304 |         |  |
| 03131 <sup>S</sup>  | 03307 |         |  |
| 03143 <sup>S</sup>  | 03315 |         |  |
| 03156               | 03331 |         |  |
| 03157               | 03334 |         |  |
| 03194 <sup>S</sup>  | 03343 |         |  |
| 03209               | 03348 |         |  |
| 03212 <sup>S</sup>  | 03365 |         |  |
| 03217               | 03371 |         |  |

|                     |       |  |  |
|---------------------|-------|--|--|
| 03243 <sup>§</sup>  | 03379 |  |  |
| 03274               | 03384 |  |  |
| 03275               | 03387 |  |  |
| 03304               | 03394 |  |  |
| 03307               | 03402 |  |  |
| 03315 <sup>§</sup>  | 03432 |  |  |
| 03334 <sup>§</sup>  | 03436 |  |  |
| 03343 <sup>§</sup>  | 03445 |  |  |
| 03348               | 03457 |  |  |
| 03365 <sup>ES</sup> | 03463 |  |  |
| 03371               | 03467 |  |  |
| 03379 <sup>§</sup>  | 03483 |  |  |
| 03384               | 03507 |  |  |
| 03394               | 03521 |  |  |
| 03402               | 03526 |  |  |
| 03432               | 03529 |  |  |
| 03436               | 03531 |  |  |
| 03445               | 03532 |  |  |
| 03457               | 03544 |  |  |
| 03463               | 03569 |  |  |
| 03467 <sup>§</sup>  | 03570 |  |  |
| 03483 <sup>§</sup>  | 03583 |  |  |
| 03507               | 03584 |  |  |
| 03521               | 03585 |  |  |
| 03526               | 03598 |  |  |
| 03529               | 03599 |  |  |
| 03531               | 03600 |  |  |
| 03532               | 03601 |  |  |
| 03569               | 03609 |  |  |
| 03583               | 03612 |  |  |
| 03584 <sup>§</sup>  | 03614 |  |  |
| 03585               | 03616 |  |  |
| 03598 <sup>§</sup>  | 03624 |  |  |
| 03599               | 03628 |  |  |
| 03600 <sup>§</sup>  | 03629 |  |  |
| 03601               | 03632 |  |  |
| 03609 <sup>§</sup>  | 03640 |  |  |
| 03612               | 03674 |  |  |
| 03614               | 03687 |  |  |
| 03616               | 03695 |  |  |
| 03624 <sup>§</sup>  | 03708 |  |  |
| 03628 <sup>§</sup>  | 03724 |  |  |

|                     |       |  |  |
|---------------------|-------|--|--|
| 03629               | 03748 |  |  |
| 03632 <sup>§</sup>  | 03769 |  |  |
| 03640               | 03784 |  |  |
| 03662 <sup>§</sup>  | 03795 |  |  |
| 03695 <sup>§</sup>  | 03813 |  |  |
| 03708               | 03820 |  |  |
| 03713               | 03846 |  |  |
| 03724               | 03858 |  |  |
| 03748               | 03865 |  |  |
| 03769               | 03867 |  |  |
| 03784               | 03883 |  |  |
| 03795 <sup>§</sup>  | 03893 |  |  |
| 03813 <sup>§</sup>  | 03894 |  |  |
| 03820               | 03896 |  |  |
| 03846               | 03901 |  |  |
| 03858               | 03904 |  |  |
| 03865 <sup>§</sup>  | 03905 |  |  |
| 03883 <sup>£</sup>  | 03908 |  |  |
| 03893               | 03911 |  |  |
| 03896               | 03916 |  |  |
| 03901               | 03922 |  |  |
| 03904               | 03944 |  |  |
| 03905 <sup>§</sup>  | 03954 |  |  |
| 03908 <sup>§</sup>  | 03958 |  |  |
| 03911               | 03960 |  |  |
| 03916               | 03969 |  |  |
| 03922               | 03972 |  |  |
| 03944               | 03986 |  |  |
| 03954 <sup>§</sup>  | 04029 |  |  |
| 03958               | 04060 |  |  |
| 03960               | 04074 |  |  |
| 03969               | 04146 |  |  |
| 03972               | 04239 |  |  |
| 03986 <sup>§</sup>  | 04380 |  |  |
| 04029               | 04429 |  |  |
| 04060               | 04434 |  |  |
| 04074 <sup>£§</sup> | 04439 |  |  |
| 04146               | 04471 |  |  |
| 04345               | 04503 |  |  |
| 04380               | 04504 |  |  |
| 04429               | 04527 |  |  |
| 04434               | 04546 |  |  |

|                     |       |  |  |
|---------------------|-------|--|--|
| 04439               | 04563 |  |  |
| 04471               | 04583 |  |  |
| 04503               | 04620 |  |  |
| 04504               | 04624 |  |  |
| 04527 <sup>ES</sup> | 04646 |  |  |
| 04546 <sup>S</sup>  | 04656 |  |  |
| 04563               | 04678 |  |  |
| 04583 <sup>S</sup>  | 04681 |  |  |
| 04620               | 04685 |  |  |
| 04624               | 04689 |  |  |
| 04656               | 04704 |  |  |
| 04678               | 04732 |  |  |
| 04685               | 04735 |  |  |
| 04689               | 04739 |  |  |
| 04704               | 04740 |  |  |
| 04732 <sup>E</sup>  | 04743 |  |  |
| 04735 <sup>S</sup>  | 04744 |  |  |
| 04739               | 04745 |  |  |
| 04740               | 04768 |  |  |
| 04743               | 04817 |  |  |
| 04744               | 04818 |  |  |
| 04745               | 04841 |  |  |
| 04758 <sup>ES</sup> | 04848 |  |  |
| 04768 <sup>S</sup>  | 04858 |  |  |
| 04781               | 04864 |  |  |
| 04817               | 04895 |  |  |
| 04818               | 04953 |  |  |
| 04841               | 04980 |  |  |
| 04848 <sup>S</sup>  | 05046 |  |  |
| 04858               | 05052 |  |  |
| 04864 <sup>S</sup>  | 05163 |  |  |
| 04895               | 05245 |  |  |
| 04953               | 05341 |  |  |
| 04980               | 05609 |  |  |
| 05046               | 05719 |  |  |
| 05052               | 05763 |  |  |
| 05163               | 05797 |  |  |
| 05245               | 05841 |  |  |
| 05341               | 05847 |  |  |
| 05345               | 05851 |  |  |
| 05609               | 05906 |  |  |
| 05628               | 05933 |  |  |

|                     |       |  |  |
|---------------------|-------|--|--|
| 05719               | 05947 |  |  |
| 05763               | 05970 |  |  |
| 05797 <sup>ES</sup> | 05983 |  |  |
| 05835               | 06017 |  |  |
| 05841               | 06087 |  |  |
| 05847               | 06110 |  |  |
| 05851 <sup>S</sup>  | 06117 |  |  |
| 05906               | 06278 |  |  |
| 05933               | 06437 |  |  |
| 05947               | 06443 |  |  |
| 05970               | 06451 |  |  |
| 05983               | 06452 |  |  |
| 06017 <sup>S</sup>  | 06463 |  |  |
| 06087               | 06465 |  |  |
| 06110               | 06466 |  |  |
| 06117               | 06469 |  |  |
| 06278 <sup>E</sup>  | 06497 |  |  |
| 06443               | 06506 |  |  |
| 06451               | 06610 |  |  |
| 06452 <sup>S</sup>  | 06612 |  |  |
| 06463 <sup>S</sup>  | 06733 |  |  |
| 06465 <sup>S</sup>  | 06775 |  |  |
| 06466 <sup>ES</sup> | 06895 |  |  |
| 06469               | 06993 |  |  |
| 06497               | 07207 |  |  |
| 06506               | 07221 |  |  |
| 06549 <sup>ES</sup> | 07238 |  |  |
| 06610               | 07435 |  |  |
| 06612               | 07551 |  |  |
| 06733               | 07569 |  |  |
| 06775               | 07608 |  |  |
| 06888               | 07625 |  |  |
| 06895               | 07629 |  |  |
| 06993 <sup>ES</sup> | 07639 |  |  |
| 07010               | 07661 |  |  |
| 07207               | 07684 |  |  |
| 07221               | 07695 |  |  |
| 07238               | 07698 |  |  |
| 07435               | 07699 |  |  |
| 07551 <sup>S</sup>  | 07721 |  |  |
| 07569 <sup>S</sup>  | 07728 |  |  |
| 07608 <sup>S</sup>  | 07755 |  |  |



|                     |       |  |  |
|---------------------|-------|--|--|
| 07625               | 07775 |  |  |
| 07629               | 07794 |  |  |
| 07639 <sup>§</sup>  | 07797 |  |  |
| 07661               | 07829 |  |  |
| 07695 <sup>§</sup>  | 07838 |  |  |
| 07698               | 07899 |  |  |
| 07699               | 07921 |  |  |
| 07721               | 07988 |  |  |
| 07728               | 07993 |  |  |
| 07755               | 07996 |  |  |
| 07772 <sup>§</sup>  | 08002 |  |  |
| 07775 <sup>ES</sup> | 08011 |  |  |
| 07794               | 08021 |  |  |
| 07797               | 08026 |  |  |
| 07829               | 08041 |  |  |
| 07838 <sup>ES</sup> | 08048 |  |  |
| 07899               | 08085 |  |  |
| 07921 <sup>§</sup>  | 08090 |  |  |
| 07988 <sup>§</sup>  | 08094 |  |  |
| 07993               | 08115 |  |  |
| 08002               | 08116 |  |  |
| 08003               | 08122 |  |  |
| 08011 <sup>§</sup>  | 08150 |  |  |
| 08026               | 08175 |  |  |
| 08048 <sup>§</sup>  | 08180 |  |  |
| 08085               | 08196 |  |  |
| 08094               | 08210 |  |  |
| 08115               | 08238 |  |  |
| 08116               | 08265 |  |  |
| 08122 <sup>§</sup>  | 08344 |  |  |
| 08150               | 08387 |  |  |
| 08175               | 08464 |  |  |
| 08180               | 08824 |  |  |
| 08196               | 08825 |  |  |
| 08210               | 08907 |  |  |
| 08238 <sup>§</sup>  | 08958 |  |  |
| 08265 <sup>ES</sup> | 08978 |  |  |
| 08344               | 08987 |  |  |
| 08387               | 09032 |  |  |
| 08464               | 09066 |  |  |
| 08493               | 09071 |  |  |
| 08824               | 09085 |  |  |

|                    |       |  |  |
|--------------------|-------|--|--|
| 08825 <sup>§</sup> | 09093 |  |  |
| 08907              | 09099 |  |  |
| 08958              | 09109 |  |  |
| 08978              | 09118 |  |  |
| 08987              | 09127 |  |  |
| 09066              | 09132 |  |  |
| 09071              | 09134 |  |  |
| 09093              | 09142 |  |  |
| 09099              | 09181 |  |  |
| 09109              | 09345 |  |  |
| 09118              | 09353 |  |  |
| 09127              | 09358 |  |  |
| 09132              | 09382 |  |  |
| 09134              | 09445 |  |  |
| 09142              | 09475 |  |  |
| 09181              | 09586 |  |  |
| 09345              | 09646 |  |  |
| 09353              | 09821 |  |  |
| 09358              | 10206 |  |  |
| 09382              | 10212 |  |  |
| 09445              | 10316 |  |  |
| 09475 <sup>§</sup> | 10357 |  |  |
| 09522 <sup>§</sup> | 10435 |  |  |
| 09586              | 10495 |  |  |
| 09646              | 10500 |  |  |
| 09821              | 10543 |  |  |
| 10206              | 10551 |  |  |
| 10212 <sup>§</sup> | 10554 |  |  |
| 10316 <sup>§</sup> | 10561 |  |  |
| 10357              | 10587 |  |  |
| 10435              | 10592 |  |  |
| 10495              | 10594 |  |  |
| 10500              | 10609 |  |  |
| 10543 <sup>§</sup> | 10611 |  |  |
| 10551              | 10670 |  |  |
| 10554              | 10675 |  |  |
| 10561              | 10676 |  |  |
| 10587              | 10677 |  |  |
| 10592              | 10712 |  |  |
| 10604              | 10713 |  |  |
| 10609 <sup>§</sup> | 10729 |  |  |
| 10611 <sup>§</sup> | 10972 |  |  |

|                     |       |  |  |
|---------------------|-------|--|--|
| 10670 <sup>§</sup>  | 10982 |  |  |
| 10675 <sup>§</sup>  | 10986 |  |  |
| 10676               | 10998 |  |  |
| 10677 <sup>§</sup>  | 10999 |  |  |
| 10712 <sup>§</sup>  | 11006 |  |  |
| 10713               | 11008 |  |  |
| 10729               | 11011 |  |  |
| 10972               | 11032 |  |  |
| 10982 <sup>§</sup>  | 11033 |  |  |
| 10986               | 11036 |  |  |
| 10998               | 11037 |  |  |
| 10999 <sup>§</sup>  | 11046 |  |  |
| 11006               | 11047 |  |  |
| 11008 <sup>£</sup>  | 11048 |  |  |
| 11011 <sup>§</sup>  | 11052 |  |  |
| 11032               | 11066 |  |  |
| 11033 <sup>£§</sup> | 11094 |  |  |
| 11036 <sup>§</sup>  | 11095 |  |  |
| 11037 <sup>£§</sup> | 11097 |  |  |
| 11046               | 11101 |  |  |
| 11047               | 11106 |  |  |
| 11048 <sup>§</sup>  | 11112 |  |  |
| 11052               | 11136 |  |  |
| 11066               | 11143 |  |  |
| 11077               | 11156 |  |  |
| 11094               | 11163 |  |  |
| 11095               | 11166 |  |  |
| 11097 <sup>£§</sup> | 11169 |  |  |
| 11106               | 11184 |  |  |
| 11112 <sup>§</sup>  | 11190 |  |  |
| 11136               | 11204 |  |  |
| 11143               | 11205 |  |  |
| 11156               | 11206 |  |  |
| 11163 <sup>§</sup>  | 11208 |  |  |
| 11166               | 11225 |  |  |
| 11169 <sup>£§</sup> | 11227 |  |  |
| 11184 <sup>£§</sup> | 11228 |  |  |
| 11190 <sup>§</sup>  | 11229 |  |  |
| 11204 <sup>£</sup>  | 11232 |  |  |
| 11205 <sup>§</sup>  | 11238 |  |  |
| 11206               | 11249 |  |  |
| 11208 <sup>§</sup>  | 11276 |  |  |

|                     |       |  |  |
|---------------------|-------|--|--|
| 11225               | 11280 |  |  |
| 11227               | 11296 |  |  |
| 11228 <sup>§</sup>  | 11304 |  |  |
| 11229               | 11315 |  |  |
| 11231               | 11318 |  |  |
| 11232               | 11326 |  |  |
| 11238               | 11348 |  |  |
| 11249 <sup>§</sup>  | 11360 |  |  |
| 11276               | 11366 |  |  |
| 11280 <sup>ES</sup> | 11379 |  |  |
| 11296               | 11386 |  |  |
| 11304 <sup>§</sup>  | 11428 |  |  |
| 11315               | 11487 |  |  |
| 11318               | 11488 |  |  |
| 11326 <sup>§</sup>  | 11493 |  |  |
| 11348 <sup>§</sup>  | 11496 |  |  |
| 11350               | 11516 |  |  |
| 11360               | 11528 |  |  |
| 11361               | 11548 |  |  |
| 11366 <sup>§</sup>  | 11559 |  |  |
| 11379               | 11602 |  |  |
| 11386 <sup>ES</sup> | 11647 |  |  |
| 11428 <sup>§</sup>  | 11648 |  |  |
| 11487 <sup>§</sup>  | 11675 |  |  |
| 11488               | 11715 |  |  |
| 11493               | 12067 |  |  |
| 11496               | 12081 |  |  |
| 11516               | 12119 |  |  |
| 11528               | 12142 |  |  |
| 11548 <sup>§</sup>  | 12206 |  |  |
| 11559               | 12210 |  |  |
| 11602               | 12214 |  |  |
| 11647               | 12251 |  |  |
| 11675               | 12300 |  |  |
| 11715               | 12369 |  |  |
| 12067               | 12390 |  |  |
| 12081               | 12434 |  |  |
| 12119               | 12504 |  |  |
| 12142               | 12514 |  |  |
| 12206               | 12548 |  |  |
| 12210               | 12551 |  |  |
| 12214               | 12554 |  |  |

|                    |               |  |  |
|--------------------|---------------|--|--|
| 12251              | 12591         |  |  |
| 12300              | 12622         |  |  |
| 12369 <sup>f</sup> | 12644         |  |  |
| 12390              | 12835         |  |  |
| 12434              | 12918         |  |  |
| 12486              | 13189         |  |  |
| 12504              | 13245         |  |  |
| 12514              | 13412         |  |  |
| 12548              | 13436         |  |  |
| 12551              | 13443         |  |  |
| 12554              | 13450         |  |  |
| 12591              | 13505         |  |  |
| 12622              | 13515         |  |  |
| 12644              | 13628         |  |  |
| 12652              | 13692         |  |  |
| 12835              | 13876         |  |  |
| 12918              | 13958         |  |  |
| 13189              | 14020         |  |  |
| 13412              | 15003         |  |  |
| 13443              | 15048         |  |  |
| 13450              | 15123         |  |  |
| 13462              | 15142         |  |  |
| 13505              | 15251         |  |  |
| 13515              | 15437         |  |  |
| 13628              | 15469         |  |  |
| 13692              | 15661         |  |  |
| 13876              | 15679(00031)* |  |  |
| 13958              | 16013(02551)* |  |  |
| 15003              | 16371(02898)* |  |  |
| 15048              | 16353(03012)* |  |  |
| 15123              | 16328(03095)* |  |  |
| 15142              | 16324(03129)* |  |  |
| 15251              | 16542(12807)* |  |  |
| 15437              | 17151(09046)* |  |  |
| 15469              | 17535(11490)* |  |  |
| 15661              | 17084(08213)* |  |  |
| 15679              | 17063(08289)* |  |  |
| 15885              | 17119(08007)* |  |  |
| 15937              | 16930(07934)* |  |  |
| 15958              | 16877(07691)* |  |  |
| 15982              | 16148(04097)* |  |  |
| 16013              | 16104(04501)* |  |  |
| 16044              | 16074(04684)* |  |  |

|       |                       |  |  |
|-------|-----------------------|--|--|
| 16066 | 16635(06332)*         |  |  |
| 16074 | 16657(06438)*         |  |  |
| 16104 | 17402(10615)*         |  |  |
| 16148 | 17405(10622)*         |  |  |
| 16163 | 17424(10656)*         |  |  |
| 16175 | 17462(11170)*         |  |  |
| 16196 | 15982(12127)*         |  |  |
| 16234 | 16163(12326)*         |  |  |
| 16324 | 17459(13840)*         |  |  |
| 16328 | 12545_16364_M(12544)* |  |  |
| 16333 | 16312(12492)*         |  |  |
| 16334 | 16111(12256)*         |  |  |
| 16353 | 16018(12160)*         |  |  |
| 16371 | 15917(12047)*         |  |  |
| 16408 | 16051(11532)*         |  |  |
| 16459 | 16431(04849)*         |  |  |
| 16542 |                       |  |  |
| 16547 |                       |  |  |
| 16584 |                       |  |  |
| 16623 |                       |  |  |
| 16635 |                       |  |  |
| 16657 |                       |  |  |
| 16668 |                       |  |  |
| 16697 |                       |  |  |
| 16759 |                       |  |  |
| 16877 |                       |  |  |
| 16883 |                       |  |  |
| 16898 |                       |  |  |
| 16930 |                       |  |  |
| 17022 |                       |  |  |
| 17063 |                       |  |  |
| 17084 |                       |  |  |
| 17115 |                       |  |  |
| 17119 |                       |  |  |
| 17151 |                       |  |  |
| 17402 |                       |  |  |
| 17405 |                       |  |  |
| 17419 |                       |  |  |
| 17424 |                       |  |  |
| 17425 |                       |  |  |
| 17434 |                       |  |  |
| 17455 |                       |  |  |
| 17459 |                       |  |  |
| 17462 |                       |  |  |

|                        |  |  |  |
|------------------------|--|--|--|
| 17468                  |  |  |  |
| 17469                  |  |  |  |
| 17494                  |  |  |  |
| 17535                  |  |  |  |
| 17545                  |  |  |  |
| 17566                  |  |  |  |
| 20027                  |  |  |  |
| 20104                  |  |  |  |
| 20176                  |  |  |  |
| 20208                  |  |  |  |
| 20240                  |  |  |  |
| 20306                  |  |  |  |
| 20325                  |  |  |  |
| 20327                  |  |  |  |
| 20377                  |  |  |  |
| 20390                  |  |  |  |
| 20400                  |  |  |  |
| 20407                  |  |  |  |
| 01818_M <sup>£\$</sup> |  |  |  |
| 02154_M                |  |  |  |
| 02909_M                |  |  |  |
| 02977_M <sup>\$</sup>  |  |  |  |
| 03034_M                |  |  |  |
| 03331_M                |  |  |  |
| 03387_M                |  |  |  |
| 03544_M                |  |  |  |
| 03570_M                |  |  |  |
| 03674_M <sup>\$</sup>  |  |  |  |
| 03687_M <sup>£\$</sup> |  |  |  |
| 03867_M <sup>£</sup>   |  |  |  |
| 03894_M                |  |  |  |
| 04165_M                |  |  |  |
| 04239_M <sup>\$</sup>  |  |  |  |
| 04374_M                |  |  |  |
| 04646_M                |  |  |  |
| 04681_M                |  |  |  |
| 04756_M                |  |  |  |
| 06437_M                |  |  |  |
| 07126_M                |  |  |  |
| 07684_M                |  |  |  |
| 07686_M                |  |  |  |
| 07996_M                |  |  |  |
| 08021_M                |  |  |  |
| 08041_M                |  |  |  |

|                      |  |  |  |
|----------------------|--|--|--|
| 08074_M              |  |  |  |
| 08090_M              |  |  |  |
| 09032_M              |  |  |  |
| 09085_M <sup>s</sup> |  |  |  |
| 09143_M              |  |  |  |
| 10563_M              |  |  |  |
| 10594_M              |  |  |  |
| 10607_M              |  |  |  |
| 10776_M              |  |  |  |
| 11101_M              |  |  |  |
| 11333_M              |  |  |  |
| 11513_M              |  |  |  |
| 11648_M              |  |  |  |
| 12405_M              |  |  |  |
| 12545_16364_M        |  |  |  |
| 13245_M              |  |  |  |
| 13435_6_M            |  |  |  |
| 13975_M              |  |  |  |
| 13987_M              |  |  |  |
| 14020_M              |  |  |  |
| 15136_M              |  |  |  |
| 15714_M              |  |  |  |
| 15917_M              |  |  |  |
| 16018_M              |  |  |  |
| 16051_M              |  |  |  |
| 16111_M              |  |  |  |
| 16312_M              |  |  |  |
| 16431_M              |  |  |  |
| 17388_M              |  |  |  |
