# Supplementary material for: The completed genome sequence of the pathogenic ascomycete fungus Fusarium graminearum
Source: PubMed Central journal article supplement (PMC4511438; doi:10.1186/s12864-015-1756-1), 2015-07-22
Supplement: 12864_2015_1756_MOESM8_ESM.pdf [file 12864_2015_1756_MOESM8_ESM.pdf]

**Additional file 8.** Gene ID's with GO term 0001071 which are identified as having nucleic acid binding transcription factor activity from either altered gene predictions or genes that were not found in the MIPS v3.2 annotation. \*Gene ID to be changed to a modified gene annotation in RRes v4.1.

| Modified RRes | New RRes            | New RRes blast hits                       |
|---------------|---------------------|-------------------------------------------|
| 02787_M       | 20236<br>(*12631_M) | cytochrome p450                           |
| 03862_M       | 20126               | hypothetical protein FG05_30313           |
| 03873_M       | 20239               | rta1 domain-containing protein            |
| 04170_M       | 20168               | hypothetical protein FG05_03154           |
| 04203_M       | 20326               | hypothetical protein FG05_35376           |
| 07575_M       | 20048               | hypothetical protein FG05_30608           |
| 09075_M       | 20289               | fungal transcriptional regulatory protein |
| 09465_M       | 20182               | hypothetical protein FG05_35086           |
| 10014_M       |                     |                                           |
| 10684_M       |                     |                                           |
| 10891_M       |                     |                                           |
| 10977_M       |                     |                                           |
| 10980_M       |                     |                                           |
| 11462_M       |                     |                                           |
| 11524_M       |                     |                                           |
| 12018_M       |                     |                                           |
| 14003_M       |                     |                                           |
| 15730_M       |                     |                                           |
| 16506_M       |                     |                                           |
| 16822_M       |                     |                                           |
| 17196_M       |                     |                                           |
| 17345_M       |                     |                                           |
| 17658_M       |                     |                                           |
| 12427_B_M     |                     |                                           |
