# Supplementary material for: The completed genome sequence of the pathogenic ascomycete fungus Fusarium graminearum
Source: PubMed Central journal article supplement (PMC4511438; doi:10.1186/s12864-015-1756-1), 2015-07-22
Supplement: 12864_2015_1756_MOESM9_ESM.pdf [file 12864_2015_1756_MOESM9_ESM.pdf]

**Additional file 9.** Distal centromere and telomere gene ID's and annotations.

| Minimum         | MIPS Annotation                                                        | RRes Annotation                          |
|-----------------|------------------------------------------------------------------------|------------------------------------------|
| Centromere 1-5' |                                                                        |                                          |
| 5S_rRNA         |                                                                        |                                          |
| 16043           | hypothetical protein                                                   |                                          |
| 02778           | probable histone H3 methyltransferase DIM-5                            |                                          |
| 02779           | conserved hypothetical protein                                         |                                          |
| 02780           | probable coatomer complex beta chain                                   |                                          |
| 11636           | probable mago nashi protein                                            |                                          |
| 11637           | probable VID24 - required for vacuolar import and degradation of Fbp1p |                                          |
| 11632           | conserved hypothetical protein                                         |                                          |
| 11633           | conserved hypothetical protein                                         |                                          |
| 11634           | related to ankyrins                                                    |                                          |
| 11594           | related to tRNA ligase                                                 |                                          |
| 11595           | conserved hypothetical protein                                         |                                          |
| 11596           | related to ribosomal protein YmL11 precursor, mitochondrial            |                                          |
| 11597           | probable 26S proteasome regulatory particle chain RPT5                 |                                          |
| 11602           | probable brefeldin A resistance protein                                |                                          |
| 11603           | related to KM-PA-2 protein                                             |                                          |
| 16044           | related to cholinesterase precursor                                    |                                          |
| centromere 1-3' |                                                                        |                                          |
| 13662           | probable RPO31 - DNA-directed RNA polymerase III, 160 KD subunit       |                                          |
| 13663           | conserved hypothetical protein                                         |                                          |
| 09861           | conserved hypothetical protein                                         |                                          |
| 09862           | probable fimbrin                                                       |                                          |
| 09863           | related to acyl-CoA cholesterol acyltransferase                        |                                          |
| 09864           | related to mRNA splicing factor                                        |                                          |
| 09865_M         | NA                                                                     | related to mitochondrial carrier protein |
| 09866           | probable ribosomal protein L18, cytosolic                              |                                          |
| 17283           | related to MRM2 - Mitochondrial rRNA methyltransferase                 |                                          |
| 09868           | conserved hypothetical protein                                         |                                          |
| 09869           | related to OST3 - oligosaccharyltransferase gamma subunit              |                                          |
| 09870           | probable CPC2 protein                                                  |                                          |
| 09871           | conserved hypothetical protein                                         |                                          |
| 09872           | conserved hypothetical protein                                         |                                          |
| 09873           | probable glycine hydroxymethyltransferase                              |                                          |
| 17593           | probable translation activator GCN1                                    |                                          |

|                   |                                                                         |                                                                  |
|-------------------|-------------------------------------------------------------------------|------------------------------------------------------------------|
| centromere 2 - 5' |                                                                         |                                                                  |
| 08944             | probable glucosamine-phosphate N-acetyltransferase                      |                                                                  |
| 08945             | conserved hypothetical protein                                          |                                                                  |
| 08946             | probable alpha-N-arabinofuranosidase / alpha-L-arabinofuranosidase      |                                                                  |
| 08947             | conserved hypothetical protein                                          |                                                                  |
| 16939             | related to response regulator Mcs4                                      |                                                                  |
| 08949             | conserved hypothetical protein                                          |                                                                  |
| 08950             | conserved hypothetical protein                                          |                                                                  |
| 20155             | not found                                                               |                                                                  |
| 16938_M           | NA                                                                      | hypothetical protein                                             |
| 16937             | hypothetical protein                                                    |                                                                  |
| 11609_M           | NA                                                                      | conserved hypothetical protein                                   |
| 20156             | not found                                                               |                                                                  |
| 11610_M           | NA                                                                      | conserved hypothetical protein                                   |
| 11590             | probable TAD2 - tRNA-specific adenosine deaminase 2                     |                                                                  |
| 16936             | hypothetical protein                                                    |                                                                  |
| 00592_M           | NA                                                                      | conserved hypothetical protein                                   |
| 13260             | hypothetical protein                                                    |                                                                  |
| centromere 2 - 3' |                                                                         |                                                                  |
| 16403             | probable sterol glucosyltransferase                                     |                                                                  |
| 16402             | hypothetical protein                                                    |                                                                  |
| 12579             | hypothetical protein                                                    |                                                                  |
| 11617             | #N/A                                                                    |                                                                  |
| 11618             | conserved hypothetical protein                                          |                                                                  |
| 11619             | probable NADH-ubiquinone oxidoreductase 21 kDa subunit                  |                                                                  |
| 11622             | conserved hypothetical protein                                          |                                                                  |
| 11623             | conserved hypothetical protein                                          |                                                                  |
| 12578_M           | NA                                                                      | probable class E vacuolar-protein sorting and endocytosis factor |
| 02781             | probable SKI2 - antiviral protein and putative helicase                 |                                                                  |
| 02782             | probable pyruvate dehydrogenase (lipoamide) beta chain precursor (PDB1) |                                                                  |
| 02783             | probable DELTA(24)-STEROL C-METHYLTRANSFERASE (ERG6)                    |                                                                  |
| 012577_M          | NA                                                                      | related to cell cycle control protein cwf5                       |
| 02784_M           | NA                                                                      | conserved hypothetical protein                                   |
| 02785             | probable zootin                                                         |                                                                  |
| 16401             | probable ATP-binding cassette multidrug transport protein ATRC          |                                                                  |
| centromere        |                                                                         |                                                                  |

|                   |                                                                          |                                              |
|-------------------|--------------------------------------------------------------------------|----------------------------------------------|
| e 3 - 5'          |                                                                          |                                              |
| 16651_M           | related to CECR1 protein                                                 |                                              |
| 06423             | conserved hypothetical protein                                           |                                              |
| 06424             | related to SRP40 - suppressor of mutant AC40 of RNA polymerase I and III |                                              |
| 06425             | conserved hypothetical protein                                           |                                              |
| 12916_M           | NA                                                                       | related to probable gtp-binding protein engb |
| 16652             | hypothetical protein                                                     |                                              |
| 16653             | related to ubiquitin-protein ligase                                      |                                              |
| 06427             | related to YBR267w                                                       |                                              |
| 06428             | conserved hypothetical protein                                           |                                              |
| centromere 3 - 3' |                                                                          |                                              |
| 13936             | hypothetical protein                                                     |                                              |
| 11598             | related to L-fucose permease                                             |                                              |
| 17530             | related to neurofibromin                                                 |                                              |
| 10716             | related to dna exoribonuclease Dhp1p                                     |                                              |
| 10717             | related to transport protein USO1                                        |                                              |
| 10718             | related to protein arginine N-methyltransferase 3                        |                                              |
| 17529             | related to permeases - unknown function                                  |                                              |
| 13934             | related to RAV1 - similarity to Drosophila DmX gene                      |                                              |
| 17739             | conserved hypothetical protein                                           |                                              |
| 10721             | conserved hypothetical protein                                           |                                              |
| 10722             | probable isoleucine--tRNA ligase                                         |                                              |
| 10723             | probable hymA gene                                                       |                                              |
| 10724             | related to SWI/SNF complex 60 kDa subunit                                |                                              |
| centromere 4- 5'  |                                                                          |                                              |
| 07954             | related to mouse proteinase activated receptor 2                         |                                              |
| 07955             | related to GPI-anchor transamidase GAA1                                  |                                              |
| 07956             | related to 26S proteasome regulatory particle chain RPN9                 |                                              |
| 13257             | probable NADH2 dehydrogenase (ubiquinone) 40K chain                      |                                              |
| 13258             | probable NADH2 dehydrogenase (ubiquinone) 40K chain                      |                                              |
| 07958             | related to ubiquitin-specific protease 22                                |                                              |
| 07959             | conserved hypothetical protein                                           |                                              |
| 07960             | related to YTP1                                                          |                                              |
| 07961             | conserved hypothetical protein                                           |                                              |
| 07962             | probable Rad54 homolog MUS-25                                            |                                              |
| 16933             | hypothetical protein                                                     |                                              |
| 07963             | related to ornithine transporter 2                                       |                                              |
| 07964             | related to member of RSC complex                                         |                                              |

|                 |                                                                                    |                                                  |
|-----------------|------------------------------------------------------------------------------------|--------------------------------------------------|
| 16934           | hypothetical protein                                                               |                                                  |
| 07966           | probable transmembrane protein UsgS                                                |                                                  |
| 07967           | conserved hypothetical protein                                                     |                                                  |
| 16935           | hypothetical protein                                                               |                                                  |
| 13259           | hypothetical protein                                                               |                                                  |
| 07969           | conserved hypothetical protein                                                     |                                                  |
| 07970_M         | NA                                                                                 | NONE                                             |
| centromere 4-3' |                                                                                    |                                                  |
| 11628           | conserved hypothetical protein                                                     |                                                  |
| 11627           | probable HTA2 - histone H2A.2                                                      |                                                  |
| 11626           | probable HTB1 - histone H2B                                                        |                                                  |
| 13661           | conserved hypothetical protein                                                     |                                                  |
| 17282_M         | NA                                                                                 | related to ATG4 - essential for autophagocytosis |
| 09857           | related to dnaJ-like proteins                                                      |                                                  |
| 09856           | conserved hypothetical protein                                                     |                                                  |
| 09855           | related to O-succinylhomoserine (thiol)-lyase                                      |                                                  |
| 17281           | hypothetical protein                                                               |                                                  |
| 09853           | conserved hypothetical protein                                                     |                                                  |
| 09852           | conserved hypothetical protein                                                     |                                                  |
| 09851           | probable SAP1 - member of the AAA-protein family                                   |                                                  |
| 09850           | related to COG6 - conserved oligomeric golgi complex                               |                                                  |
| 13660           | probable APG9 - integral membrane protein required for Cvt and autophagy transport |                                                  |
| 13659           | hypothetical protein                                                               |                                                  |

|                          |         |                                            |                          |
|--------------------------|---------|--------------------------------------------|--------------------------|
| Telomeres -first 2 genes |         |                                            |                          |
|                          | ID      |                                            |                          |
| chr 1 - 5'               | 16072_M | hypothetical protein                       | homology in chr2 ?       |
|                          | 11606   | related to hexose transporter protein      |                          |
| chr 1 - 3'               | 17444   | related to flavin-containing monooxygenase |                          |
|                          | 13822_M | related to flavin-containing monooxygenase |                          |
|                          |         |                                            |                          |
| chr 2 - 5'               | 14031_M | conserved hypothetical protein             | no homology in other chr |
|                          | 15663   | hypothetical protein                       |                          |

|                               |                     |                                                                                                                                 |                                        |
|-------------------------------|---------------------|---------------------------------------------------------------------------------------------------------------------------------|----------------------------------------|
| chr<br>2 -<br>3'              | 11586               | conserved hypothetical protein                                                                                                  |                                        |
|                               | 11587_M             | probable sterol glucosyltransferase                                                                                             | no homology in other chr               |
| chr<br>3 -<br>5'              | 20223               | NA                                                                                                                              |                                        |
|                               | 12581_2_M           | hypothetical protein                                                                                                            | NA but MIPS given;                     |
| chr<br>3 -<br>3'              |                     |                                                                                                                                 |                                        |
|                               | 15657_M             | hypothetical protein                                                                                                            |                                        |
|                               | 20327               | NA                                                                                                                              |                                        |
|                               | 20328               | NA                                                                                                                              | Has homology to chromosome 2 -5' end ! |
| chr<br>4 -<br>5'              | 14027_16070_11614_M | Ankyrin repeat domain protein; amily: Ank_2 (PF12796)                                                                           |                                        |
|                               | 11613_M             | conserved hypothetical protein                                                                                                  |                                        |
|                               | 16071               | hypothetical protein                                                                                                            |                                        |
| chr<br>4 -<br>3'              | tRNA                |                                                                                                                                 |                                        |
| (def ense resp onse relat ed) | 08956_M             | NB-ARC doamin signalling motif; related to kinesin light chain                                                                  |                                        |
|                               | 13478               | conserved hypothetical protein                                                                                                  |                                        |
|                               | 08955_M             | related to WD40-repeat protein (notchless protein)                                                                              |                                        |
|                               | 8954                | conserved hypothetical protein                                                                                                  |                                        |
|                               | 13477               | conserved hypothetical protein                                                                                                  |                                        |
|                               | 13476               | conserved hypothetical protein                                                                                                  |                                        |
|                               | 17133               | related to RSA4 - WD-repeat protein required for maturation and efficient intra-nuclear transport or pre-60S ribosomal subunits | NA but MIPS given                      |
| (def ense resp onse relat ed) | 17709_M             | NB-ARC domain signalling motif; related to calcium-independent phospholipase A2                                                 |                                        |
|                               | 20409               | NA                                                                                                                              |                                        |
|                               | 20412               | NA                                                                                                                              |                                        |
|                               | rRNA cluster        | 28S(?)rRNA                                                                                                                      |                                        |

|                  |                   |                                                                                      |        |
|------------------|-------------------|--------------------------------------------------------------------------------------|--------|
| neocentromere    |                   |                                                                                      |        |
|                  | ID                |                                                                                      |        |
| chr<br>3 -<br>5' |                   |                                                                                      |        |
|                  | 17445             | Aconitase/3-isopropylmalate dehydratase                                              | iron   |
|                  | 13824             | P-loop containing nucleoside triphosphate hydrolase,<br>NACHT                        |        |
|                  | 17446             | Multi-copper oxidase                                                                 | copper |
|                  | 11236             | phosphoesterase                                                                      |        |
|                  | 17447             | NACHT domain                                                                         |        |
|                  | 11234_M           | TRANSCRIPTION TERMINATION FACTOR 2                                                   |        |
|                  | 11232             | Amine oxidase                                                                        |        |
|                  | 11231             | MOLYBDOPTERIN COFACTOR SULFURASE                                                     |        |
| chr<br>3 -<br>3' |                   |                                                                                      |        |
|                  | 11620             | ARRESTIN-RELATED TRAFFICKING ADAPTER 3-RELATED                                       |        |
|                  | 17589             | Marvel domain, MAL and related proteins for vesicle<br>trafficking and membrane link |        |
|                  | 17597_112<br>39_M | Potassium channel                                                                    |        |
|                  | 11240             | ATP-BINDING CASSETTE TRANSPORTER                                                     |        |
|                  | 11241             | EXOPOLYPHOSPHATASE                                                                   |        |
|                  | 17587             | Aerobactin siderophore biosynthesis                                                  | iron   |
