# Supplementary material for: The completed genome sequence of the pathogenic ascomycete fungus Fusarium graminearum
Source: PubMed Central journal article supplement (PMC4511438; doi:10.1186/s12864-015-1756-1), 2015-07-22
Supplement: 12864_2015_1756_MOESM10_ESM.pdf [file 12864_2015_1756_MOESM10_ESM.pdf]

**Additional file 10.** The alignment positions of the AT rich regions from the *F. verticillioides* chromosomes to the sequences immediately flanking the centromeres in RRes v4.0 *F. graminearum*.

| FG Chromosome centromere | Amino centromere flank |                |                    | Carboxyl centromere flank |                |                    |
|--------------------------|------------------------|----------------|--------------------|---------------------------|----------------|--------------------|
|                          | Chromosome             | Position (Mbp) | Orientation (R/F)* | Chromosome                | Position (Mbp) | Orientation (R/F)* |
| 1                        | 5                      | 2.65           | F                  | 5                         | 0.00           | F                  |
| 2                        | 6                      | 3.90           | F                  | N/A                       | N/A            | N/A                |
| 3                        | 2                      | 2.06           | F                  | DS486012 (supercontig)    | 0.00           | R                  |
| 4                        | 4                      | 3.30           | F                  | 4                         | 2.30           | R                  |
| 4 (neocentromere)        | N/A                    | N/A            | N/A                | N/A                       | N/A            | N/A                |

\*R/F = reverse complement or forward orientation of reference sequence

\*\*N/A = no homology
