# Supplementary material for: The completed genome sequence of the pathogenic ascomycete fungus Fusarium graminearum
Source: PubMed Central journal article supplement (PMC4511438; doi:10.1186/s12864-015-1756-1), 2015-07-22
Supplement: 12864_2015_1756_MOESM11_ESM.pdf [file 12864_2015_1756_MOESM11_ESM.pdf]

**Additional file 11.** RRes v4.0 gene models that have changed since MIPS v3.2 that are present in PHI-base. <sup>A</sup> MIPS gene ID version 30 unless <sup>B</sup> MIPS gene call version 3.2; <sup>C</sup> gene homolog name provided in brackets.

| PHI-base ID | MIPS gene ID <sup>A</sup> | Mutant phenotype in planta | Gene name or homolog <sup>C</sup> |
|-------------|---------------------------|----------------------------|-----------------------------------|
| PHI:1182    | FGSG_13318                | Reduced virulence          | Sc Mec1                           |
| PHI:1206    | FGSG_04053                | Reduced virulence          | Sp Prp4                           |
| PHI:1251    | FGSG_01506 <sup>B</sup>   | Unaffected pathogenicity   |                                   |
| PHI:1270    | FGSG_03146 <sup>B</sup>   | Unaffected pathogenicity   |                                   |
| PHI:1276    | FGSG_09150 <sup>B</sup>   | Unaffected pathogenicity   |                                   |
| PHI:1278    | FGSG_11614 <sup>B</sup>   | Unaffected pathogenicity   |                                   |
| PHI:1281    | FGSG_02153 <sup>B</sup>   | Unaffected pathogenicity   |                                   |
| PHI:1286    | FGSG_07812 <sup>B</sup>   | Unaffected pathogenicity   |                                   |
| PHI:1338    | FGSG_13313                | Unaffected pathogenicity   | GzbZIP020                         |
| PHI:1339    | FGSG_13759                | Unaffected pathogenicity   | GzbZIP021                         |
| PHI:1359    | FGSG_02788                | Unaffected pathogenicity   | GzC2H019                          |
| PHI:1377    | FGSG_06168                | Unaffected pathogenicity   | GzC2H040                          |
| PHI:1385    | FGSG_07075                | Unaffected pathogenicity   | GzC2H048                          |
| PHI:1386    | FGSG_07187                | Unaffected pathogenicity   | GzC2H049                          |
| PHI:1392    | FGSG_07751                | Unaffected pathogenicity   | GzC2H055                          |
| PHI:1397    | FGSG_07952                | Unaffected pathogenicity   | GzC2H060                          |
| PHI:1400    | FGSG_08246                | Unaffected pathogenicity   | GzC2H063                          |
| PHI:1431    | FGSG_12970                | Unaffected pathogenicity   | Pac1                              |
| PHI:1432    | FGSG_12973                | Unaffected pathogenicity   | GzC2H100                          |
| PHI:1435    | FGSG_13492                | Unaffected pathogenicity   | GzC2H104                          |
| PHI:1437    | FGSG_13896                | Unaffected pathogenicity   | GzC2H106                          |
| PHI:1466    | FGSG_07087                | Unaffected pathogenicity   | GzCCAAT006                        |
| PHI:1483    | FGSG_04557                | Unaffected pathogenicity   | GzHMG015                          |
| PHI:1486    | FGSG_05604                | Unaffected pathogenicity   | GzHMG018                          |
| PHI:1498    | FGSG_10762                | Lethal                     | GzHMG030                          |

|          |            |                          |            |
|----------|------------|--------------------------|------------|
| PHI:1502 | FGSG_12323 | Unaffected pathogenicity | GzHMG034   |
| PHI:1527 | FGSG_13431 | Lethal                   | GzHOMEL040 |
| PHI:1627 | FGSG_08551 | Unaffected pathogenicity | GzTF2S002  |
| PHI:1645 | FGSG_07433 | Unaffected pathogenicity | GzWing017  |
| PHI:1660 | FGSG_11696 | Unaffected pathogenicity | GzCCCH004  |
| PHI:1669 | FGSG_10277 | Unaffected pathogenicity | GzCCHC009  |
| PHI:1675 | FGSG_06542 | Unaffected pathogenicity | GzDHHC003  |
| PHI:1684 | FGSG_04258 | Unaffected pathogenicity | GzRad002   |
| PHI:1695 | FGSG_10977 | Unaffected pathogenicity | GzZC010    |
| PHI:1696 | FGSG_11051 | Unaffected pathogenicity | GzZC011    |
| PHI:1697 | FGSG_11462 | Unaffected pathogenicity | GzZC012    |
| PHI:1698 | FGSG_10891 | Unaffected pathogenicity | GzZC013    |
| PHI:1701 | FGSG_04496 | Unaffected pathogenicity | GzZC016    |
| PHI:1702 | FGSG_07575 | Unaffected pathogenicity | GzZC017    |
| PHI:1707 | FGSG_04170 | Unaffected pathogenicity | GzZC022    |
| PHI:1713 | FGSG_02825 | Unaffected pathogenicity | GzZC028    |
| PHI:1714 | FGSG_06448 | Lethal                   | GzZC029    |
| PHI:1715 | FGSG_06380 | Unaffected pathogenicity | GzZC030    |
| PHI:1718 | FGSG_13652 | Unaffected pathogenicity | GzZC033    |
| PHI:1721 | FGSG_13344 | Unaffected pathogenicity | GzZC036    |
| PHI:1748 | FGSG_12528 | Unaffected pathogenicity | GzZC063    |
| PHI:1751 | FGSG_09726 | Unaffected pathogenicity | GzZC066    |
| PHI:1805 | FGSG_08028 | Reduced virulence        | GzZC120    |
| PHI:1823 | FGSG_09075 | Unaffected pathogenicity | GzZC138    |
| PHI:1826 | FGSG_10980 | Unaffected pathogenicity | GzZC141    |
| PHI:1833 | FGSG_04203 | Unaffected pathogenicity | GzZC148    |
| PHI:1838 | FGSG_02787 | Unaffected pathogenicity | GzZC153    |
| PHI:1840 | FGSG_06460 | Unaffected pathogenicity | GzZC155    |
| PHI:1846 | FGSG_12729 | Unaffected pathogenicity | GzZC161    |
| PHI:1851 | FGSG_09064 | Lethal                   | GzZC166    |
| PHI:1863 | FGSG_04671 | Unaffected pathogenicity | GzZC178    |

|          |            |                          |         |
|----------|------------|--------------------------|---------|
| PHI:1864 | FGSG_14003 | Unaffected pathogenicity | GzZC179 |
| PHI:1865 | FGSG_13455 | Unaffected pathogenicity | GzZC180 |
| PHI:1886 | FGSG_07693 | Unaffected pathogenicity | GzZC201 |
| PHI:1894 | FGSG_05716 | Unaffected pathogenicity | GzZC209 |
| PHI:1905 | FGSG_03294 | Unaffected pathogenicity | GzZC220 |
| PHI:1908 | FGSG_03226 | Unaffected pathogenicity | GzZC223 |
| PHI:1911 | FGSG_03207 | Unaffected pathogenicity | GzZC226 |
| PHI:1949 | FGSG_03485 | Lethal                   | GzZC264 |
| PHI:1957 | FGSG_04888 | Unaffected pathogenicity | GzZC272 |
| PHI:1963 | FGSG_06503 | Unaffected pathogenicity | GzZC278 |
| PHI:1995 | FGSG_00196 | Unaffected pathogenicity | GzZC310 |
| PHI:2386 | FGSG_12857 | Loss of pathogenicity    | ACL1    |
| PHI:2395 | FGSG_00950 | Reduced virulence        | GzSYN1  |
