# Supplementary material for: The completed genome sequence of the pathogenic ascomycete fungus Fusarium graminearum
Source: PubMed Central journal article supplement (PMC4511438; doi:10.1186/s12864-015-1756-1), 2015-07-22
Supplement: 12864_2015_1756_MOESM12_ESM.pdf [file 12864_2015_1756_MOESM12_ESM.pdf]

**Additional file 12.** RRes *F. graminearum* recombinant and non-recombinant region comparison. No observable pattern was identified between the high recombinant and non-highly recombinant regions when chromosomal positions were also taken into account.

| Region                   | Chrom                           | Position               | length    | AT (%) | Gene no. | Gene no. per 100 kb | Secretome no. | Modified Gene no. | New gene no. |
|--------------------------|---------------------------------|------------------------|-----------|--------|----------|---------------------|---------------|-------------------|--------------|
| Recombinant region 1     | 1 (5' long arm)                 | 32,785<br>575,729      | 542,944   | 53.4   | 233      | 42.91               | 20            | 26                | 7            |
| Recombinant region 2     | 3 (5' long arm)                 | 12,014<br>401,069      | 389,055   | 53.6   | 169      | 43.44               | 18            | 22                | 8            |
| Recombinant region 3     | 1 (central long arm)            | 5,639,082<br>6,032,689 | 393,607   | 52.4   | 161      | 40.90               | 13            | 20                | 2            |
| Recombinant region 4     | 2 (3' end long arm)             | 8,387,552<br>8,806,410 | 418,858   | 53.7   | 171      | 40.83               | 18            | 33                | 3            |
| Recombinant region 5     | 4 (central long arm)            | 4,064,366<br>4,608,192 | 543,826   | 53.2   | 249      | 45.79               | 19            | 37                | 8            |
| Non-recombinant region 1 | 1 (adjacent to 5' end long arm) | 866,719<br>1,471,900   | 605,181   | 50.9   | 221      | 36.52               | 2             | 13                | 5            |
| Non-recombinant region 2 | 3 (adjacent to 5' end long arm) | 651,956<br>1,687,347   | 1,035,391 | 51.4   | 419      | 40.47               | 7             | 28                | 13           |
| Non-recombinant region 3 | 4 (3' end short arm)            | 7,219,363<br>7,842,145 | 622,782   | 52.4   | 263      | 42.23               | 18            | 46                | 9            |
| Non-recombinant region 4 | 2 (central short arm)           | 1,757,141<br>2,235,287 | 478,146   | 51.2   | 170      | 35.55               | 0             | 29                | 4            |
