# Supplementary material for: The completed genome sequence of the pathogenic ascomycete fungus Fusarium graminearum
Source: PubMed Central journal article supplement (PMC4511438; doi:10.1186/s12864-015-1756-1), 2015-07-22
Supplement: 12864_2015_1756_MOESM13_ESM.pdf [file 12864_2015_1756_MOESM13_ESM.pdf]

**Additional file 13.** RRes Repeat masking details and gene ID's identified with transposon domains.

In total using RepeatModeller, 12 repeat motif containing sequences were identified including a long terminal direct repeat (LTR) of the gypsy group, TcMar-Ant1, TcMar-Pogo, TcMar-Marin and TcMar-Fot1 transposon identified as two large repeat sequences, 15 other unknown repeat sequences, one SINE and one rRNA located in the chromosomal 4 repetitive region (previously discussed).

| Transposon Gene ID (FGRRES_) | Transposon class           |
|------------------------------|----------------------------|
| 08954                        | TcMar-Ant1                 |
| 06490                        | TcMar-Ant1,<br>TcMar-ISRm1 |
| 13478                        | TcMar-Ant1,<br>LTR-Gypsy   |
| 05781                        | TcMar-Tc1                  |
| 15950                        | TcMar-Fot1                 |
| 17263                        | TcMar-Fot1                 |
| 16975                        | TcMar-Fot1                 |
| 13431_M                      | TcMar-Fot1                 |
| 07243                        | TcMar-Pogo                 |
| 05264                        | TcMar-Pogo                 |
| 08846                        | TcMar-Marin                |
| 20409                        | LTR/Gypsy                  |
