# Supplementary material for: The completed genome sequence of the pathogenic ascomycete fungus Fusarium graminearum
Source: PubMed Central journal article supplement (PMC4511438; doi:10.1186/s12864-015-1756-1), 2015-07-22
Supplement: 12864_2015_1756_MOESM14_ESM.pdf [file 12864_2015_1756_MOESM14_ESM.pdf]

**Additional file 14.** Transposon and repeat content of centromeres and subtelomeric AT rich regions.

| Chromosome/region      | Simple repeat (total length bp) no. | Low complexity repeat (total length bp) no. | Transposon (total length bp) no. | Length of region (bp) | Transposon classes     |
|------------------------|-------------------------------------|---------------------------------------------|----------------------------------|-----------------------|------------------------|
| 1 Amino subtelomere    | (69) 1                              | 0                                           | (1,725) 1                        | 6,000                 | MarCry-1_FO            |
| 1 Centromere           | (854) 17                            | (586) 9                                     | (31,828) 34                      | 56,581                | MarCry-1_FO, LTR-Gypsy |
| 1 Carboxyl subtelomere | (1,744) 38                          | (630) 8                                     | (141)                            | 15,700                | MarCry-1_FO            |
| 2 Amino subtelomere    | (60) 1                              | 0                                           | (3,738) 2                        | 6,000                 | MarCry-1_FO            |
| 2 Centromere           | (1,848) 33                          | (442) 8                                     | (35,049) 43                      | 65,181                | MarCry-1_FO, LTR-Gypsy |
| 2 Carboxyl subtelomere | (123) 2                             | 0                                           | (1,159) 3                        | 3,600                 | MarCry-1_FO, LTR-Gypsy |
| 3 Amino subtelomere    | (384) 7                             | (42) 1                                      | (746) 2                          | 10,800                | MarCry-1_FO, LTR-Gypsy |
| 3 Centromere           | (278) 7                             | 0                                           | (35,251) 25                      | 56,387                | MarCry-1_FO, LTR-Gypsy |
| 3 Carboxyl subtelomere | (1,003) 18                          | (250) 5                                     | (6,080) 12                       | 21,300                | MarCry-1_FO, LTR-Gypsy |
| 3 neocentromere        | (513) 10                            | (679) 2                                     | (7,901) 10                       | 14,951                | MarCry-1_FO, LTR-Gypsy |
| 4 Amino subtelomere    | 0                                   | 0                                           | (372) 1                          | 661                   | LTR-Gypsy              |
| 4 centromere           | (746) 16                            | (228) 5                                     | (33,842) (31)                    | 60,933                | MarCry-1_FO, LTR-Gypsy |
