# Supplementary material for: The completed genome sequence of the pathogenic ascomycete fungus Fusarium graminearum
Source: PubMed Central journal article supplement (PMC4511438; doi:10.1186/s12864-015-1756-1), 2015-07-22
Supplement: 12864_2015_1756_MOESM18_ESM.pdf [file 12864_2015_1756_MOESM18_ESM.pdf]

**Additional file 18.** RRes *F. graminearum* detailed statistics of chromosome arms.

| Chromosome | Genes | FG unique | Secretome | GC (%) | C<br>E<br>N<br>T<br>R<br>O<br>M<br>E<br>R<br>E | Genes | FG unique | Secretome | GC (%)         | Total GC content (%)* |
|------------|-------|-----------|-----------|--------|------------------------------------------------|-------|-----------|-----------|----------------|-----------------------|
| 1          | 3,354 | 143       | 111       | 48.5   |                                                | 1,039 | 66        | 34        | 48.2           | 48.3                  |
| 2          | 1,250 | 99        | 42        | 48.1   |                                                | 2,395 | 130       | 192       | 47.8           | 47.6                  |
| 3          | 2,104 | 102       | 61        | 48.6   |                                                | 986   | 58        | 81        | 47.6           | 48.0                  |
| 4          | 1,937 | 119       | 61        | 48.4   |                                                | 1,095 | 48        | 34        | 49.7<br>48.6** | 48.8                  |
| Total      | 8,645 | 463       | 275       | 48.4   |                                                | 5,515 | 302       | 341       | 48.3<br>48.1** | 48.2 (Avg.)           |

\*Excluding N bases

\*\* Excluding large repetitive sequence at the carboxyl end of chromosome 4

This table excludes the 4 unique genes found on supercontig 3.12
