# Supplementary material for: The completed genome sequence of the pathogenic ascomycete fungus Fusarium graminearum
Source: PubMed Central journal article supplement (PMC4511438; doi:10.1186/s12864-015-1756-1), 2015-07-22

**Additional file 19. The composition of the centromere sequences in chromosomes 1-4 and read coverage.**

Summary frequency of bases, percentage composition and percentage GC content for each of the centromeres of chromosomes 1-4.

| Composition | 1      |        | 2      |        | 3      |        | 4      |        |
|-------------|--------|--------|--------|--------|--------|--------|--------|--------|
|             | Freq   | %      | Freq   | %      | Freq   | %      | Freq   | %      |
| A:          | 24,365 | 43.10% | 29,288 | 44.90% | 23,774 | 42.20% | 27,334 | 44.90% |
| C:          | 3,661  | 6.50%  | 4,594  | 7.00%  | 3,523  | 6.20%  | 3,643  | 6.00%  |
| G:          | 3,588  | 6.30%  | 4,277  | 6.60%  | 3,722  | 6.60%  | 3,754  | 6.20%  |
| T:          | 24,955 | 44.10% | 27,022 | 41.50% | 25,368 | 45.00% | 26,202 | 43.00% |
| N:          | 12     | 0.00%  | 0      | 0.00%  | 0      | 0.00%  | 0      | 0.00%  |
| GC:         | 7,249  | 12.80% | 8,871  | 13.60% | 7,245  | 12.80% | 7,397  | 12.10% |

Image of mapped reads to centromere sequences (75 kbp window). Green = A, Blue = T, Yellow = C, Red = G.

Centromere1

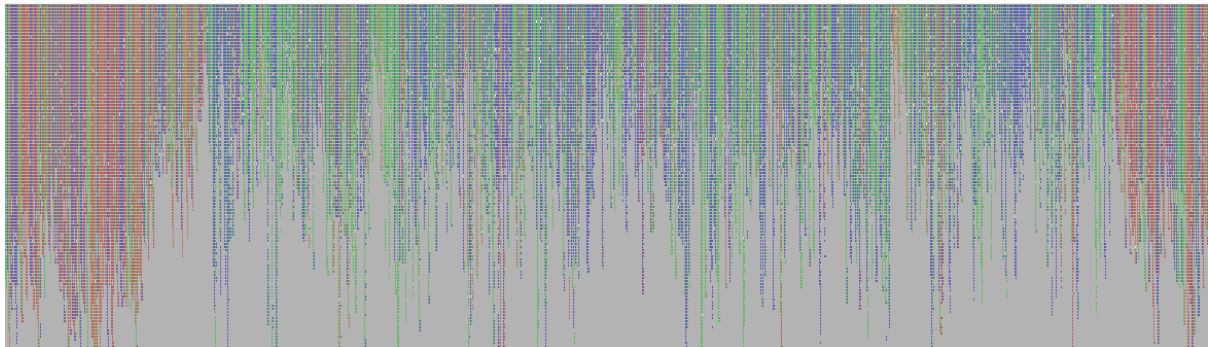

Centromere2

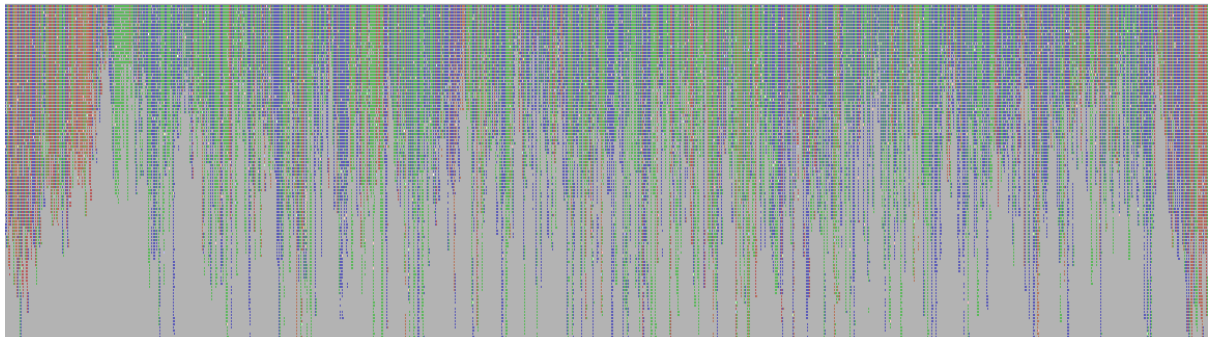

Centromere3

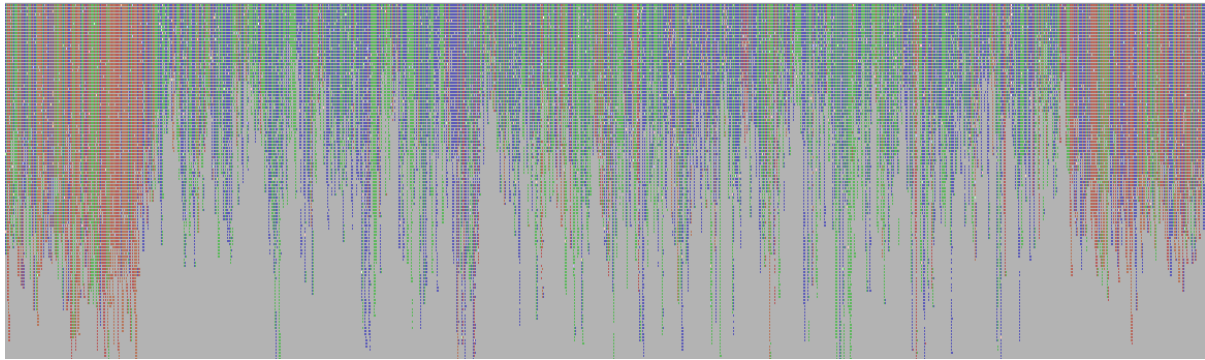

Centromere4

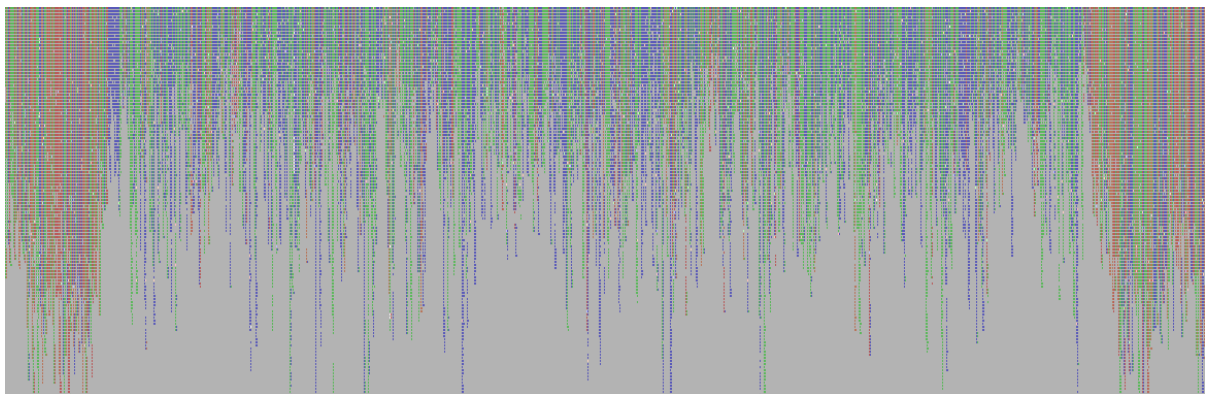

Image of Chromosome regions GC/AT graphs. Yellow represents the proposed centromere sequences and the region annotated with a red arrow represent regions of lower AT content and higher GC. Region 1 of chromosome 2 and region 3 of chromosome 3 represents a region of respectively approximately 7,194 bp and 450 bp and 22.8% and 53.8% GC content.

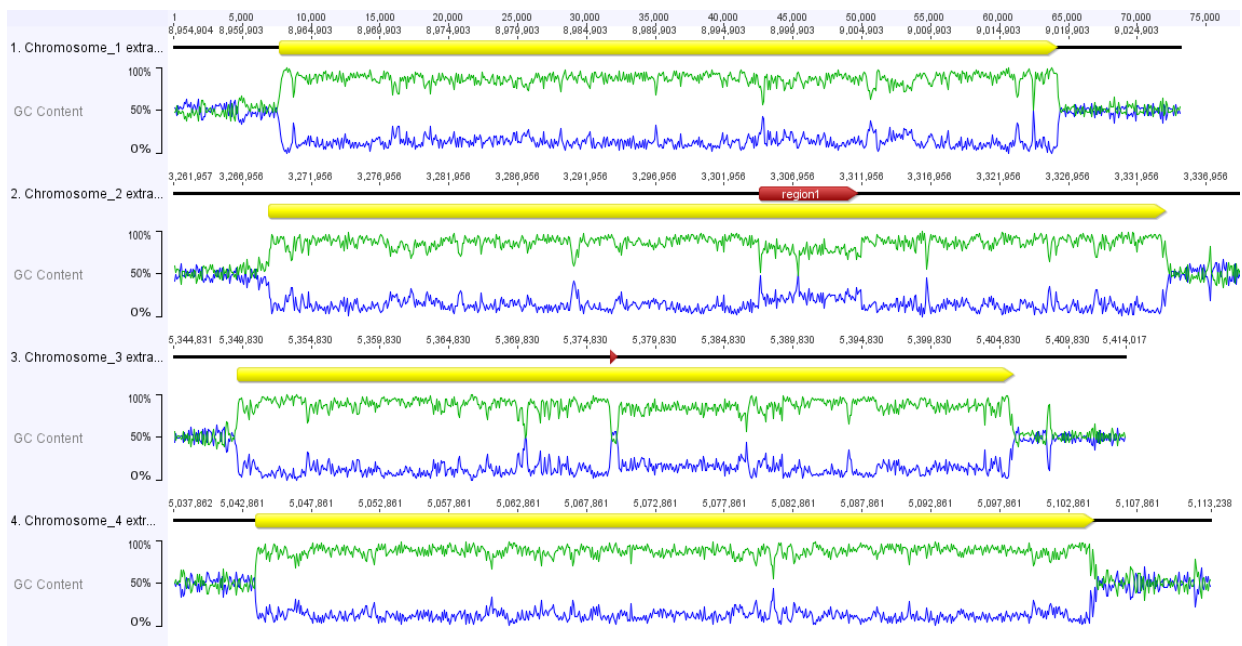

Supplement: 12864_2015_1756_MOESM19_ESM.pdf [file 12864_2015_1756_MOESM19_ESM.pdf]
